# Supplementary material for: Genome-wide characterization of genetic variants and putative regions under selection in meat and egg-type chicken lines
Source: PubMed Central journal article supplement (PMC5785814; doi:10.1186/s12864-018-4444-0), 2018-01-25

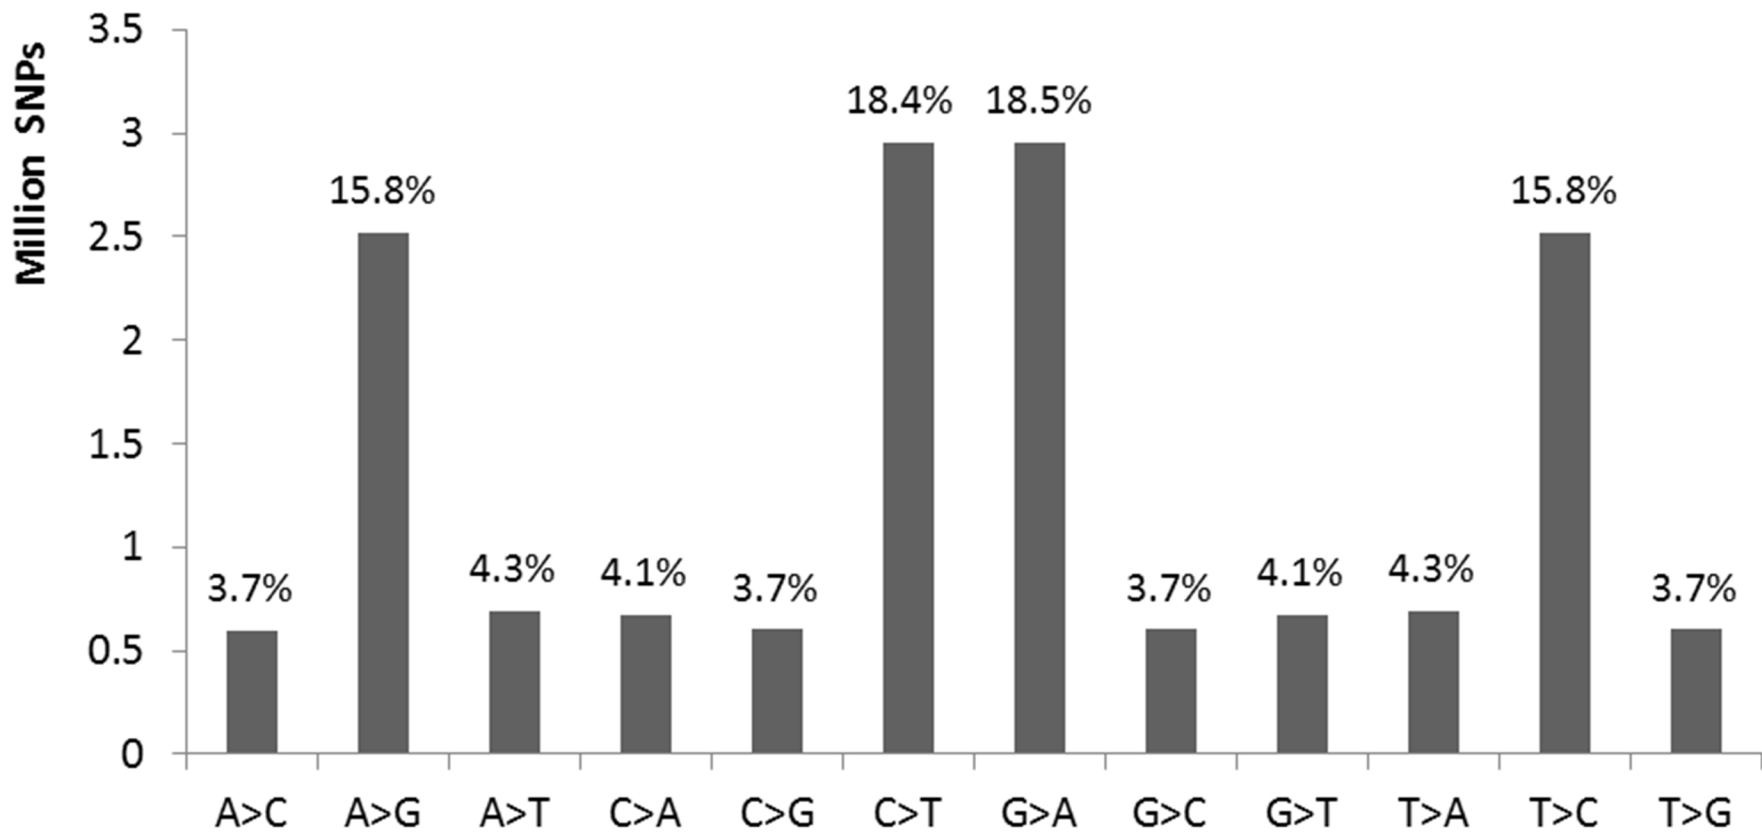

Supplement: 12864_2018_4444_MOESM1_ESM.pdf [file 12864_2018_4444_MOESM1_ESM.pdf]
